# Supplementary material
Source: Springer Nature journal article supplement (https://www.springermedizin.de/resource/supplementary/12891_2010_1165_MOESM9_ESM.pdf/9507214)

| <b>Study or Subgroup</b>                                                                              | <b>Std. Mean Difference<br/>IV, Random, 95% CI</b> |
|-------------------------------------------------------------------------------------------------------|----------------------------------------------------|
| Fransen 2007                                                                                          | 0.24 [-0.13, 0.62]                                 |
| Gill 2009                                                                                             | 0.45 [-0.04, 0.94]                                 |
| Suomi 2003                                                                                            | -0.62 [-1.52, 0.28]                                |
| <b>Total (95% CI)</b>                                                                                 | <b>0.16 [-0.29, 0.62]</b>                          |
| Heterogeneity: $\tau^2 = 0.08$ ; $\text{Chi}^2 = 4.19$ , $\text{df} = 2$ ( $P = 0.12$ ); $I^2 = 52\%$ |                                                    |
| Test for overall effect: $Z = 0.71$ ( $P = 0.48$ )                                                    |                                                    |

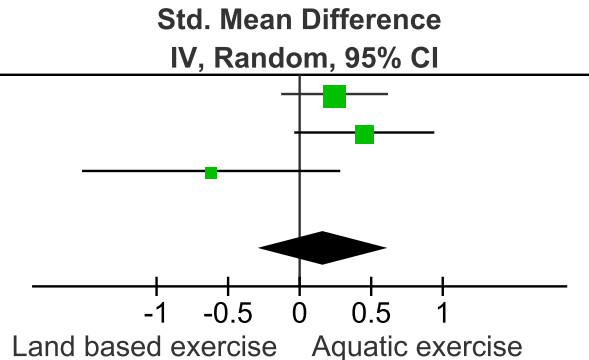

Supplement: MOESM9 [file 9507214]
